# Supplementary material for: Roles of the Different Sub-Regions of the Insular Cortex in Various Phases of the Decision-Making Process
Source: PubMed Central journal article supplement (PMC4658437; doi:10.3389/fnbeh.2015.00309), 2015-11-25
Supplement: Table_1.pdf [file Table_1.pdf]

**Table S1.** MNI coordinates mapping in according with Chang et al. parcellations (2012). If original paper provided coordinates in Talairax space they are listed in the most right column.

| <b>Concept</b>               | <b>Source</b>                           | <b>MNI<br/>Coordi-<br/>nates</b> | <b>Contrast</b>                                                                   | <b>Insula<br/>Region</b> | <b>Talairax<br/>coordi-<br/>nates as<br/>reported</b> |
|------------------------------|-----------------------------------------|----------------------------------|-----------------------------------------------------------------------------------|--------------------------|-------------------------------------------------------|
| Self-initiated stopping      | Brass & Haggard,<br>2007                | -33,9,-12                        | stopping action vs. completing                                                    | vAI                      | -31,8,-6                                              |
| Self-initiated stopping      | Brass & Haggard,<br>2007                | 35,19,-17                        | stopping action vs. completing                                                    | vAI                      | 32,17,-9                                              |
| Urge to smoke PET &<br>fMRI  | Brody et al., 2002                      | 38,23,-3                         | metabolic changes positively<br>associated with urge to smoke in<br>heavy smokers | dAI                      | 34,20,4                                               |
| Urge to smoke PET &<br>fMRI  | Brody et al., 2002                      | 40,8,-2                          | metabolic changes positively<br>associated with urge to smoke in<br>heavy smokers | dAI                      | 36,6,4                                                |
| Urge to smoke PET &<br>fMRI  | Brody et al., 2002                      | -38,5,-7                         | metabolic changes positively<br>associated with urge to smoke in<br>heavy smokers | dAI                      | -36,4,-2                                              |
| Urge to smoke PET &<br>fMRI  | Brody et al., 2002                      | -29,11,-12                       | metabolic changes positively<br>associated with urge to smoke in<br>heavy smokers | vAI                      | -28,10,-6                                             |
| Urge to smoke                | Brody et al., 2007                      | -49,17,1                         | positively correlated with craving                                                | dAI                      | -46,14,6                                              |
| Urge to smoke                | Brody et al., 2007                      | -31,23,0                         | positively correlated with craving                                                | dAI                      | -30,20,6                                              |
| Urge to smoke                | Brody et al., 2007                      | -40,13,2                         | positively correlated with craving                                                | dAI                      | -38,10,6                                              |
| Urge to smoke                | Brody et al., 2007                      | -36,9,9                          | positively correlated with craving                                                | dAI                      | -34,6,12                                              |
| Skewness                     | Burke & Tobler,<br>2011                 | -33,14,-17                       | positive skewness vs. negative<br>skewness                                        | vAI                      |                                                       |
| Skewness                     | Burke & Tobler,<br>2011                 | -30,8,-17                        | positive skewness > 0 skewness ><br>negative skewness                             | vAI                      |                                                       |
| Loss chasing game            | Campbell-<br>Meiklejohn et al.,<br>2008 | 36,18,0                          | chasing losses vs. quit chasing<br>losses                                         | dAI                      |                                                       |
| Loss chasing game            | Campbell-<br>Meiklejohn et al.,<br>2008 | -32,20,2                         | chasing losses vs. quit chasing<br>losses                                         | dAI                      |                                                       |
| Connectivity                 | Cohen et al., 2005                      | -42,20,0                         | connectivity to ACC during high<br>risk                                           | dAI                      |                                                       |
| Connectivity                 | Cohen et al., 2005                      | 35,25,-17                        | connectivity to ACC during low<br>risk                                            | vAI <sup>1</sup>         |                                                       |
| Cognitive Control<br>Network | Cole & Schneider,<br>2007               | 38,22,5                          | target switching vs. non-switching                                                | dAI                      | 34,18,11                                              |
| Cognitive Control<br>Network | Cole & Schneider,<br>2007               | -35,21,4                         | target switching vs. non-switching                                                | dAI                      | -33,18,9                                              |
| Task-set system              | Dosenbach et al.,<br>2006               | -37,17,0                         | overlap of start-cue, sustained, and<br>error-related activations                 | dAI                      | -35,14,5                                              |

<sup>1</sup> Plus sign indicates that the foci outside of the insula as defined by the masks but only 1 pixel off the area identified. Which means that the activation defined in the paper would include the identified area.

| <b>Concept</b>                               | <b>Source</b>          | <b>MNI<br/>Coordi-<br/>nates</b> | <b>Contrast</b>                                                | <b>Insula<br/>Region</b> | <b>Talairax<br/>coordi-<br/>nates as<br/>reported</b> |
|----------------------------------------------|------------------------|----------------------------------|----------------------------------------------------------------|--------------------------|-------------------------------------------------------|
| Task-set system                              | Dosenbach et al., 2006 | 40,19,-3                         | overlap of start-cue, sustained, and error-related activations | dAI                      | 36,16,4                                               |
| Task-set system                              | Dosenbach et al., 2006 | 39,20,-2                         | start-cue processing attention re-focus                        | dAI                      | 35,17,5                                               |
| Task-set system                              | Dosenbach et al., 2006 | -37,16,0                         | start-cue processing attention re-focus                        | dAI                      | -35,13,5                                              |
| Neural correlates of consciousness of thirst | Egan et al., 2003      | -39,-20,18                       | thirst vs. baseline 25min after saline injection               | PI                       | -37,-22,18                                            |
| Neural correlates of consciousness of thirst | Egan et al., 2003      | 43,19,6                          | maximum thirst increase                                        | dAI                      | 39,15,12                                              |
| Neural correlates of consciousness of thirst | Egan et al., 2003      | -41,27,-3                        | maximum thirst increase                                        | dAI                      | -39,24,3                                              |
| Neural correlates of consciousness of thirst | Egan et al., 2003      | -41,15,8                         | maximum thirst increase                                        | dAI                      | -39,12,12                                             |
| Neural response to reward                    | Elliott et al., 2003   | 50,-11,-4                        | reward vs. no-reward                                           | PI+                      | 45,-12,0                                              |
| Smoking cue reactivity                       | Engelman et al., 2012  | -28,-26,14                       | ALE: smoking cue > neutral cue                                 | vAI                      | -27,-27,14                                            |
| Cocaine urges in users and controls          | Garavan et al., 2000   | 45,-4,14                         | cocaine users exposed to cocaine film                          | PI                       | 40,-7,17                                              |
| Exposure to erotic stimuli                   | Gizewski et al., 2006  | -44,-4,3                         | male-female in luteal phase                                    | dAI                      | -42,-6,6                                              |
| Exposure to erotic stimuli                   | Gizewski et al., 2006  | 50,-6,-6                         | male-female in luteal phase                                    | PI+                      | 45,-7,-1                                              |
| Exposure to erotic stimuli                   | Gizewski et al., 2006  | -44,-2,0                         | male-female menstrual phase                                    | dAI                      | -42,-3,3                                              |
| Exposure to erotic stimuli                   | Gizewski et al., 2006  | 48,-2,-2                         | male-female menstrual phase                                    | ADI                      | 43,-4,3                                               |
| Exposure to erotic stimuli                   | Gizewski et al., 2006  | -44,-2,-7                        | female in luteal vs. menstrual phase                           | PI+/dAI+                 | -42,-3,-3                                             |
| Exposure to erotic stimuli                   | Gizewski et al., 2006  | 46,2,-7                          | female in luteal vs. menstrual phase                           | PI                       | 42,0,-1                                               |
| Error awareness                              | Harsay et al., 2012    | 34,18,-12                        | aware errors vs. unaware errors                                | vAI                      |                                                       |
| Error awareness                              | Harsay et al., 2012    | 50,8,-4                          | aware errors vs. unaware errors                                | dAI                      |                                                       |
| Anticipation of ambiguities uncertain gain   | Huettel, 2006          | 41,19,9                          | decision phase, risk including ambiguity                       | dAI                      |                                                       |
| Internally triggered action when             | Jenkins et al., 2000   | -38,13,8                         | self initiated vs. externally triggered action                 | dAI                      | -36,10,12                                             |
| Internally triggered action when             | Jenkins et al., 2000   | 38,22,2                          | self initiated vs. externally triggered action                 | dAI                      | 34,18,8                                               |
| Drug related urges in men: cocaine           | Kilts et al., 2001     | -33,-2,15                        | cocaine imagery vs. neutral story                              | PI                       | -32,-5,17                                             |
| Drug related urges in men: cocaine           | Kilts et al., 2001     | -41,21,0                         | cocaine imagery vs. neutral story                              | dAI                      | -39,18,5                                              |
| Drug related urges in men: cocaine           | Kilts et al., 2001     | 50,19,-7                         | cocaine imagery vs. anger story                                | dAI                      | 45,16,0                                               |

| <b>Concept</b>                               | <b>Source</b>          | <b>MNI<br/>Coordi-<br/>nates</b> | <b>Contrast</b>                                                        | <b>Insula<br/>Region</b> | <b>Talairax<br/>coordi-<br/>nates as<br/>reported</b> |
|----------------------------------------------|------------------------|----------------------------------|------------------------------------------------------------------------|--------------------------|-------------------------------------------------------|
| Drug related urges in men: cocaine           | Kilts et al., 2001     | -36,23,-6                        | cocaine imagery vs. anger story                                        | dAI                      | -34,20,0                                              |
| Drug related urges in women: cocaine         | Kilts et al., 2004     | -36,-1,6                         | cocaine images vs. neutral                                             | PI                       | -34,-3,9                                              |
| Error awareness                              | Klein et al., 2007     | 41,23,-14                        | aware errors vs. unaware errors                                        | dAI+/ vAI+               | 37,21,-6                                              |
| Error awareness                              | Klein et al., 2007     | -43,14,-5                        | aware errors vs. unaware errors                                        | dAI                      | -41,12,0                                              |
| Anticipatory response to uncertain gain/loss | Knutson & Greer, 2008  | 33,23,-5                         | gain anticipation-loss anticipation                                    | vAI                      | 30,20,2                                               |
| Anticipatory response to uncertain gain/loss | Knutson & Greer, 2008  | 27,23,-7                         | loss anticipation-gain anticipation                                    | vAI                      | 24,20,-8                                              |
| Anticipatory response to uncertain gain/loss | Knutson & Greer, 2008  | -38,19,-4                        | loss anticipation-gain anticipation                                    | dAI                      | -36,16,2                                              |
| Anticipatory response to uncertain gain/loss | Knutson & Greer, 2008  | 36,21,-7                         | gain anticipation -gain outcome                                        | dAI                      | 32,18,0                                               |
| Anticipatory response to uncertain gain/loss | Knutson & Greer, 2008  | 51,14,-9                         | gain anticipation-gain outcome                                         | dAI                      | 46,12,-2                                              |
| Monetary incentive delay                     | Knutson et al., 2000   | 37,19,0                          | reward trials vs. no incentive                                         | dAI                      | 33,16,6                                               |
| Monetary incentive delay                     | Knutson et al., 2000   | 36,23,-3                         | punishment vs. no incentive                                            | dAI                      |                                                       |
| Anticipatory response to predict purchase    | Knutson et al., 2007   | 32,24,-9                         | viewing product, then price                                            | vAI                      | 29,21,-1                                              |
| Anticipatory response to predict purchase    | Knutson et al., 2007   | -28,23,-10                       | viewing product, then price                                            | vAI                      | -27, 21,-3                                            |
| Risk vs. safe choice in investment paradigm  | Kuhlen & Knutson, 2005 | -41,22,2                         | anticipatory                                                           | dAI                      | -39, 19, 7                                            |
| Risk vs. safe choice in investment paradigm  | Kuhlen & Knutson, 2005 | 42,23,5                          | anticipatory                                                           | dAI                      | 38, 19, 11                                            |
| Self-initiated stopping                      | Kuhn & Brass, 2009     | -39,21,-7                        | decide nogo vs. instructed stop                                        | dAI                      |                                                       |
| Self-initiated stopping                      | Kuhn & Brass, 2009     | 42,25,-4                         | decide nogo vs. instructed stop                                        | dAI                      |                                                       |
| SMH                                          | Lawrence et al 2009    | -36, 6, -6                       | deck selection in IGT: risky-safe                                      | dAI                      |                                                       |
| SMH                                          | Lawrence et al 2009    | -30, 12,-12                      | deck selection in IGT: risky-safe                                      | vAI                      |                                                       |
| SMH                                          | Lawrence et al 2009    | 36,27,3                          | deck selection in IGT: risky-safe positive correlation with game score | dAI                      |                                                       |
| SMH                                          | Lawrence et al 2009    | -36, 15, -6                      | post error trials slower RT vs. not no slower RT                       | dAI                      |                                                       |
| Post-error slowing                           | Li et al., 2008        | 36,20,8                          | post error trials slower RT vs. not no slower RT                       | dAI                      |                                                       |

| <b>Concept</b>                                               | <b>Source</b>              | <b>MNI<br/>Coordi-<br/>nates</b> | <b>Contrast</b>                                       | <b>Insula<br/>Region</b> | <b>Talairax<br/>coordi-<br/>nates as<br/>reported</b> |
|--------------------------------------------------------------|----------------------------|----------------------------------|-------------------------------------------------------|--------------------------|-------------------------------------------------------|
| Post-error slowing                                           | Li et al., 2008            | 44,24,-4                         | post error trials slower RT vs. not slower RT         | dAI                      |                                                       |
| Post-error slowing                                           | Li et al., 2008            | -32,20,12                        | post error trials slower RT vs. not slower RT         | dAI                      |                                                       |
| Post-error slowing                                           | Li et al., 2008            | -44,16,-4                        | post error trials slower RT vs. not slower RT         | dAI                      |                                                       |
| Urge to smoke                                                | McBride et al., 2006       | -36,12,2                         | smoking video vs. control video                       | dAI                      |                                                       |
| Risk components:<br>value, perceived risk &<br>risk attitude | Mohr et al., 2010          | 44,22,-2                         | making judgment of perceived risk                     | dAI                      |                                                       |
| Risk components:<br>value, perceived risk &<br>risk attitude | Mohr et al., 2010          | 32,12,-22                        | making judgment of perceived risk                     | vAI                      |                                                       |
| Internally triggered<br>action what                          | Mueller et al., 2007       | -41,7,2                          | which button to press: free choice<br>vs. instruction | dAI                      | -39,5,6                                               |
| Internally triggered<br>action what                          | Mueller et al., 2007       | 43,10,-6                         | which button to press: free choice<br>vs. instruction | vAI                      | 39,8,0                                                |
| Activation during<br>alcohol cues in<br>alcoholics           | Myrick et al., 2004        | 41,-5,-14                        | alcohol vs. non alcoholic beverage                    | vAI                      | 37,-5,-8                                              |
| Activation during<br>alcohol cues in<br>alcoholics           | Myrick et al., 2004        | -48,15,-10                       | alcohol vs. non alcoholic beverage                    | dAI                      | -45,13,-4                                             |
| Activation during<br>alcohol cues in<br>alcoholics           | Myrick et al., 2004        | 47,22,-13                        | alcohol vs. control image                             | dAI+                     | 43,20,-5                                              |
| Activation during<br>alcohol cues in<br>alcoholics           | Myrick et al., 2004        | -39,3,-8                         | alcohol vs. control image                             | vAI                      | -37,2,-3                                              |
| Task-level control                                           | Nelson et al., 2010        | -28,24,-18                       | Ventral ROI                                           | vAI +                    | -27,22,-10                                            |
| Task-level control                                           | Nelson et al., 2010        | -33,31,-8                        | Anterior ROI                                          | vAI +                    | -31,28,-1                                             |
| Task-level control                                           | Nelson et al., 2010        | -35,26,4                         | Dorsal ROI                                            | vAI <sup>2</sup>         | -33,22,9                                              |
| Task-level control                                           | Nelson et al., 2010        | -34,17,9                         | Dorsal-posterior ROI                                  | dAI <sup>2</sup>         | -33,13,13                                             |
| Task-level control                                           | Nelson et al., 2010        | 41,12,-5                         | Posterior ROI                                         | dAI                      | -37,10,1                                              |
| Sure smaller win vs.<br>chance of larger win                 | Paulus & Frank,<br>2006    | -38,19,-8                        | anticipation: high reward vs. low<br>reward           | dAI                      | -36,17,-2                                             |
| Diff expected reward<br>and risk                             | Preuschoff et al.,<br>2006 | -34,-4,9                         | immediate expected reward value                       | PI                       | -33,-6,11                                             |
| Diff. expected reward<br>and risk                            | Preuschoff et al.,<br>2006 | -27,21,-5                        | immediate expected reward value                       | vAI                      | -26,18,1                                              |
| Diff. expected reward<br>and risk                            | Preuschoff et al.,<br>2006 | -34,20,-5                        | immediate reward variance                             | vAI                      | -32,17,1                                              |
| Diff. expected reward<br>and risk                            | Preuschoff et al.,<br>2006 | 38,16,-6                         | immediate reward variance                             | dAI                      | 34,13,1                                               |

<sup>2</sup> Since only the most anterior portion of insula was examined in this paper the ROI names do not match with sub-regions we are discussing

| <b>Concept</b>                                               | <b>Source</b>           | <b>MNI<br/>Coordi-<br/>nates</b> | <b>Contrast</b>                                             | <b>Insula<br/>Region</b> | <b>Talairax<br/>coordi-<br/>nates as<br/>reported</b> |
|--------------------------------------------------------------|-------------------------|----------------------------------|-------------------------------------------------------------|--------------------------|-------------------------------------------------------|
| Diff. expected reward and risk                               | Preuschoff et al., 2006 | -31,25,4                         | delayed reward variance                                     | vAI                      | -30,21,9                                              |
| Risk prediction and risk prediction error                    | Preuschoff et al., 2008 | 36,17,-11                        | risk prediction error (1s epoch after 1 <sup>st</sup> card) | vAI                      | 32,15,-3.3                                            |
| Risk prediction and risk prediction error                    | Preuschoff et al., 2008 | -33,16,-8                        | risk prediction error (1s epoch after 1 <sup>st</sup> card) | vAI                      | -31,14,-2.4                                           |
| Risk prediction and risk prediction error                    | Preuschoff et al., 2008 | 37,25,1                          | risk prediction (between cards 1 & 2, 2d epoch)             | dAI                      | 33,21,8                                               |
| Risk prediction and risk prediction error                    | Preuschoff et al., 2008 | -32,26,2                         | risk prediction (between cards 1 & 2, 2d epoch)             | vAI/dAI+                 | -31,22,7.7                                            |
| Anticipation vs. consumption for monetary and social rewards | Rademacher et al., 2010 | -48,11,-8                        | monetary reward anticipation vs.no reward                   | dAI                      | -45,9,-3                                              |
| Anticipation vs consumption for \$ and social rewards        | Rademacher et al., 2010 | 34,-32,22                        | social reward anticipation vs. no reward                    | PI+                      | 30,-34,21                                             |
| Social decisions PD game                                     | Rilling et al., 2008a   | 39,13,-4                         | unreciprocated vs. reciprocated cooperation                 | dAI                      | 35,11,2                                               |
| Social decisions PD game                                     | Rilling et al., 2008a   | -34,16,-12                       | unreciprocated vs. reciprocated cooperation                 | vAI                      | -32,14,-6                                             |
| Social decisions PD game                                     | Rilling et al., 2008a   | 41,25,-8                         | unreciprocated vs. reciprocated cooperation                 | dAI                      | 37,22,0                                               |
| Social decisions PD game                                     | Rilling et al., 2008a   | -34,19,-10                       | unreciprocated vs. reciprocated cooperation                 | vAI                      | -32,17,-4                                             |
| Neural correlates of sexual arousal                          | Safron et al., 2007     | -34,5,16                         | erotic preferred gender vs. non-preferred                   | PI                       | -33,2,18                                              |
| Neural correlates of sexual arousal                          | Safron et al., 2007     | -39,-1,1                         | erotic preferred gender vs. sports                          | PI                       | -37,-3,4                                              |
| Cue reactivity in heroin addicts                             | Sell et al., 1999       | -40,11,-14                       | after heroin injection while watching heroin salient video  | vAI                      | -38,10,-8                                             |
| Reward magnitude                                             | Smith et al., 2009      | 42,-6,-10                        | Large - small reward                                        | vAI                      | 38,-7,-5                                              |
| Saliency Network                                             | Sridharan et al., 2008  | 34,26,-6                         | Insula ROI                                                  | dAI                      |                                                       |
| Neural coding of risk dimensions: skewness and variance      | Symmonds et al., 2011   | 30,16,-14                        | positive correlation with increase in positive skewness     | vAI                      |                                                       |
| Cue reactivity in alcohol dependent vs. controls             | Tapert et al., 2004     | -47,-11,15                       | alcohol cues, alcohol dependent vs. control participants    | PI                       | -45,-13,16                                            |
| Neural correlates of hunger and satiation                    | Tataranni et al., 1999  | -44,18,-6                        | hunger after 36hr fast vs. satiation (liquid meal)          | dAI                      | -42,16,0                                              |
| Neural correlates of hunger and satiation                    | Tataranni et al., 1999  | 38,-7,-5                         | hunger after 36hr fast vs. satiation (liquid meal)          | PI                       | 34,-8,0                                               |
| Itching and scratching                                       | Vierow et al., 2009     | -37,16,2                         | scratching during itch                                      | dAI                      | -35,13,7                                              |
| Itching and scratching                                       | Vierow et al., 2009     | 45,16,-4                         | scratching during itch                                      | dAI                      | 41,13,3                                               |

| <b>Concept</b>                          | <b>Source</b>       | <b>MNI<br/>Coordi-<br/>nates</b> | <b>Contrast</b>                                | <b>Insula<br/>Region</b>    | <b>Talairax<br/>coordi-<br/>nates as<br/>reported</b> |
|-----------------------------------------|---------------------|----------------------------------|------------------------------------------------|-----------------------------|-------------------------------------------------------|
| Itching and scratching                  | Vierow et al., 2009 | 49,-27,21                        | scratching during itch                         | in paper<br>PI <sup>3</sup> | 44,-29,21                                             |
| Itching and scratching                  | Vierow et al., 2009 | -48,-32,23                       | scratching during itch                         | in paper<br>PI <sup>3</sup> | -46,-33,21                                            |
| Uncertainty                             | Volz, 2004          | -27,28,0                         | Anticipation of uncertainty vs. certainty      | vAI                         | -26,24,6                                              |
| Uncertainty                             | Volz, 2004          | 31,26,2                          | Anticipation of uncertainty vs. certainty      | vAI                         | 28,22,9                                               |
| Skewness                                | Wu et al., 2011     | 33,27,-7                         | High vs low variance                           | vAI                         | 30, 24, 1                                             |
| Skewness                                | Wu et al., 2011     | --32,26,-11                      | High vs low variance                           | vAI +                       | -30, 24, -4                                           |
| Skewness                                | Wu et al., 2011     | 33,26,-7                         | Skew vs. non skew                              | vAI                         | 30, 23, 1                                             |
| Skewness                                | Wu et al., 2011     | -35,26,-5                        | Skew vs. non skew                              | vAI                         | -33, 23, 1                                            |
| ALE meta on mean, variance and skewness | Wu et al., 2012     | -34,18,-6                        | High vs. low variance                          | vAI                         | -32,16,0                                              |
| ALE meta on mean, variance and skewness | Wu et al., 2012     | 36,16,-9                         | High vs. low variance                          | vAI                         | -32,14,-2                                             |
| ALE meta on mean, variance and skewness | Wu et al., 2012     | 36,19,-5                         | High vs. low mean                              | dAI                         | 34,16,2                                               |
| ALE meta on mean, variance and skewness | Wu et al., 2012     | -31,20,-6                        | High vs. low mean                              | vAI                         | -30,18,0                                              |
| Effect of prior risk                    | Xue et al., 2010    | -36,14,-2                        | outcome phase, risk vs. no-risk                | dAI                         |                                                       |
| Effect of prior risk                    | Xue et al., 2010    | -38,14,-2                        | outcome phase, risk vs. no-risk                | dAI                         |                                                       |
| Effect of prior risk                    | Xue et al., 2010    | 40,18,-10                        | outcome phase, risk-win vs. no-risk            | dAI                         |                                                       |
| Effect of prior risk                    | Xue et al., 2010    | -34,10,8                         | decision after non-risk vs. risk win           | dAI                         |                                                       |
| Effect of prior risk                    | Xue et al., 2010    | 48,4,2                           | decision after non-risk vs. risk win           | dAI                         |                                                       |
| Effect of prior risk                    | Xue et al., 2010    | 48,2,0                           | risk vs. non-risk decisions                    | dAI                         |                                                       |
| Effect of prior risk                    | Xue et al., 2010    | 34,22,-14                        | risk-seeking after non-risk vs. after risk-win | vAI                         |                                                       |
| Effect of prior risk                    | Xue et al., 2010    | -30,24,2                         | risk-seeking after non-risk vs. after risk-win | vAI                         |                                                       |

<sup>3</sup> The coordinates fell outside of the mask but the area identified in paper as stated (PI)
