# Supplementary material for: Roles of the Different Sub-Regions of the Insular Cortex in Various Phases of the Decision-Making Process
Source: PubMed Central journal article supplement (PMC4658437; doi:10.3389/fnbeh.2015.00309), 2015-11-25
Supplement: Table_2.pdf [file Table_2.pdf]

**Table S2.** Glossary

| <b>Abbreviation</b> | <b>Term</b>                      |
|---------------------|----------------------------------|
| ACC                 | Anterior Cingulate Cortex        |
| AIC                 | Anterior Insular Cortex          |
| CCN                 | Cognitive Control Network        |
| CEN                 | Central Executive Network        |
| dACC                | dorsal Anterior Cingulate Cortex |
| dAI                 | dorsal Anterior Insula           |
| dAIC                | dorsal Anterior Insular Cortex   |
| DLPFC               | Dorsolateral Prefrontal Cortex   |
| DMN                 | Default Mode Network             |
| dPMC                | dorsal Pre-Motor Cortex          |
| EEG                 | Electroencephalography           |
| IAPS                | Affective Picture System         |
| IC                  | Insular cortex                   |
| IFJ                 | Inferior Frontal Junction        |
| IGT                 | Iowa Gambling Task               |
| LOFC                | Lateral Orbitofrontal Cortex     |
| MPFC                | Medial Prefrontal Cortex         |
| Nacc                | Nucleus Accumbens                |
| OFC                 | Orbitofrontal Cortex             |
| PFC                 | Prefrontal Cortex                |
| PI                  | Posterior Insula                 |
| PIC                 | Posterior Insular Cortex         |
| pMFC                | Posterior Medial Frontal cortex  |
| PPC                 | Posterior Parietal Cortex        |
| pSMA                | pre-Supplementary Motor Area     |
| SMA                 | Supplementary Motor Area         |
| SMH                 | Somatic Marker Hypothesis        |
| TPJ                 | Temporo-Parietal Junction        |
| vAI                 | Ventral Anterior Insula          |
| vAIC                | Ventral Anterior Insular Cortex  |
| VTA                 | Ventral-Tegmental Area           |
